# Supplementary material for: Bidirectional Pathways between Maternal and Child Depressive Symptoms: Mediating Roles of Family Routines and Household Chaos
Source: Research Square preprint supplement (doi:10.21203/rs.3.rs-8332350/v1), 2025-12-30
Supplement: Supplementary file 1 [file e75f450259604193fd3aca4b.docx]

**Bidirectional Pathways between Maternal and Child Depressive Symptoms: Mediating Roles of Family Routines and Household Chaos**

**Supplemental Material**

The full bidirectional path analysis model, which included T1 maternal and child depressive symptoms, T8 family routines, T8 household chaos, and T10 maternal and child depressive symptoms, demonstrated acceptable fit (χ²[10] = 7.61, *p* = .67, CFI = 1.00, RMSEA = .00, SRMR = .03; see Figure S1). Both the direct pathway between T1 and T10 maternal depressive symptoms, (*β* = .77, *p* < .001) and the direct pathway between T1 and T10 child depressive symptoms (*β* = .59, *p* < .001) were significant. In addition, the pathway from T1 maternal depressive symptoms to T10 child depressive symptoms was positive (*β* = .43, *p* = .02). However, the pathway from T1 child depressive symptoms to T10 maternal depressive symptoms was not significant (*β* = .42, *p* = .17). Both T1 maternal depressive symptoms and child depressive symptoms were positively associated with T8 household chaos (*β* = .35, *p* = .003 and *β* = .32, *p* = .005, respectively). T8 household chaos was positively associated with T10 maternal depressive symptoms, at a trend level (*β* = .46, *p* = .06), but was not significantly associated with T10 child depressive symptoms (*β* = .36, *p* = .38). Household chaos was not a significant indirect pathway for T1 maternal depressive symptoms predicting T10 child depressive symptoms (*β* = .02, *p* = .39) nor for T1 child depressive symptoms predicting T10 maternal depressive symptoms (*β* = .03, *p* = .12). Neither T1 maternal depressive symptoms (*β* = -.20, *p* = .09) nor child depressive symptoms (*β* = -.19, *p* = .15) were significantly associated with T8 family routines. However, T8 family routines were negatively associated with T10 maternal depressive symptoms (*β* = -.32, *p* = .02) but were not significantly associated with T10 child depressive symptoms (*β* =.-.25, *p* = .07). Family routines were not a significant pathway for T1 maternal depressive symptoms predicting T10 child depressive symptoms (*β* = .024, *p* = .21) nor for T1 child depressive symptoms predicting T10 maternal depressive symptoms (*β* = .016, *p* = .22).

The total indirect effect accounting for both pathways between T1 child depressive symptoms and T10 maternal depressive symptoms was significant (*β* = .04, *p* = .049). However, the total indirect effect accounting for both pathways between T1 maternal depressive symptoms and T10 child depressive symptoms was not significant (*β* = .04, *p* = .12). Based on this model, 18% of the variance in T8 household chaos was explained by the model, 5% of the variance in T8 family routines was explained by the model, 68% of the variance in T10 maternal depressive symptoms was explained by the model, and 43% of the variance in T10 child depressive symptoms was explained by the model.

When both indirect pathways were entered into the full model simultaneously, neither family routines nor household routines remained significant, likely reflecting shared variance between the constructs (e.g., Ackerman & Brown, 2010; Jiang et al., 2023). When both family routines and household chaos were entered into the model together, neither routines nor chaos were uniquely significant, but their combined indirect effect was significant for the child-to-mother pathway, highlighting the role of broader family disorganization, particularly household chaos.

**Figure S1**

*Full Bidirectional Model with T8 Family Routines & Household Chaos*

T10 Maternal Depressive Symptoms

T1 Maternal Depressive Symptoms

*β* = .77***

*β* = -.20

*β* = -.32*

T8 Family Routines

*β* = -.25

*β* = .43*

*β* = .35**

*β* = .46*

*β* = .19

*β* = -.43***

*β* = .36***

*β* = .42*

*β* = -.19

T8 Household Chaos

*β* = .36

*β* = .32**

T10 Child Depressive Symptoms

T1 Child Depressive Symptoms

*β* = .59***

*Note.* * *p* < .05; ***p* < .01*; ***p* < .001. Standardized coefficients are presented. Covariates: T1 Maternal Age and T1 Child Age.
